# Supplementary material
Source: PubMed Central journal article supplement (PMC7577648)
Supplement: 12015_2020_10056_MOESM1_ESM.pdf [file 12015_2020_10056_MOESM1_ESM.pdf]

## Supplemental Data

### Table S1

| Phenotype                    | Cell population    |
|------------------------------|--------------------|
| CD34+                        | HSC/HPC enriched   |
| CD34+CD38-CD45RA-CD90+CD49f+ | HSC                |
| CD34+CD38-CD45RA-CD90-CD49f- | MPP                |
| CD34+CD38-CD45RA+CD10+       | MLP                |
| CD34+CD38+CD10-CD45RA-       | CMP_MEPEP enriched |
| CD34+CD38+CD10-CD45RA+       | GMP_enriched       |
| FSC-low SSC-low CD3+         | T cells            |
| FSC-low SSC-low CD3+CD4+     | CD4+ T cells       |
| FSC-low SSC-low CD3+CD8+     | CD8+ T cells       |
| FSC-low SSC-low CD3+CD4+CD8+ | CD4+CD8+ T cells   |
| FSC-low SSC-low CD3+CD4-CD8- | CD4-CD8- T cells   |
| FSC-low SSC-low CD3+CD56+    | NKT cells          |
| FSC-low SSC-low CD3-CD56+    | NK cells           |
| FSC-low SSC-low CD19+        | B cells            |
| FSC-high SSC-mid CD14+       | Monocytes          |

**Table S1: Immunophenotypes.** Shown are the parameters used to define primitive and mature hematopoietic cell immunophenotypes.

### Table S2

| Antibody_target-fluorochrome      | Company        | Catalog Number |
|-----------------------------------|----------------|----------------|
| ACE2-FITC                         | Bioss          | bs-0295P-FITC  |
| Rabbit_IgG-FITC (isotype control) | Bioss          | bs-1004R-FITC  |
| CD34-APC                          | BD Biosciences | 555824         |
| CD38-PE                           | BD Biosciences | 555460         |
| CD45RA-PE-CF594                   | BD Biosciences | 562298         |
| CD10-PE-Cy7                       | BD Biosciences | 565282         |
| CD90-BV421                        | BD Biosciences | 562556         |
| CD49f-PerCp-Cy5.5                 | BD Biosciences | 562475         |
| CD3-APC                           | BD Biosciences | 555342         |
| CD4-BV421                         | BioLegend      | 317433         |
| CD8-PerCp-Cy5.5                   | BD Biosciences | 560662         |
| CD56-PE                           | BD Biosciences | 555516         |
| CD19-PE                           | BD Biosciences | 555413         |
| CD14-BV421                        | BioLegend      | 301829         |

**Table S2: Antibodies used in flow cytometry studies.** Shown are the antibodies and colors used to define primitive and mature hematopoietic cell immunophenotypes.

# Figure S1

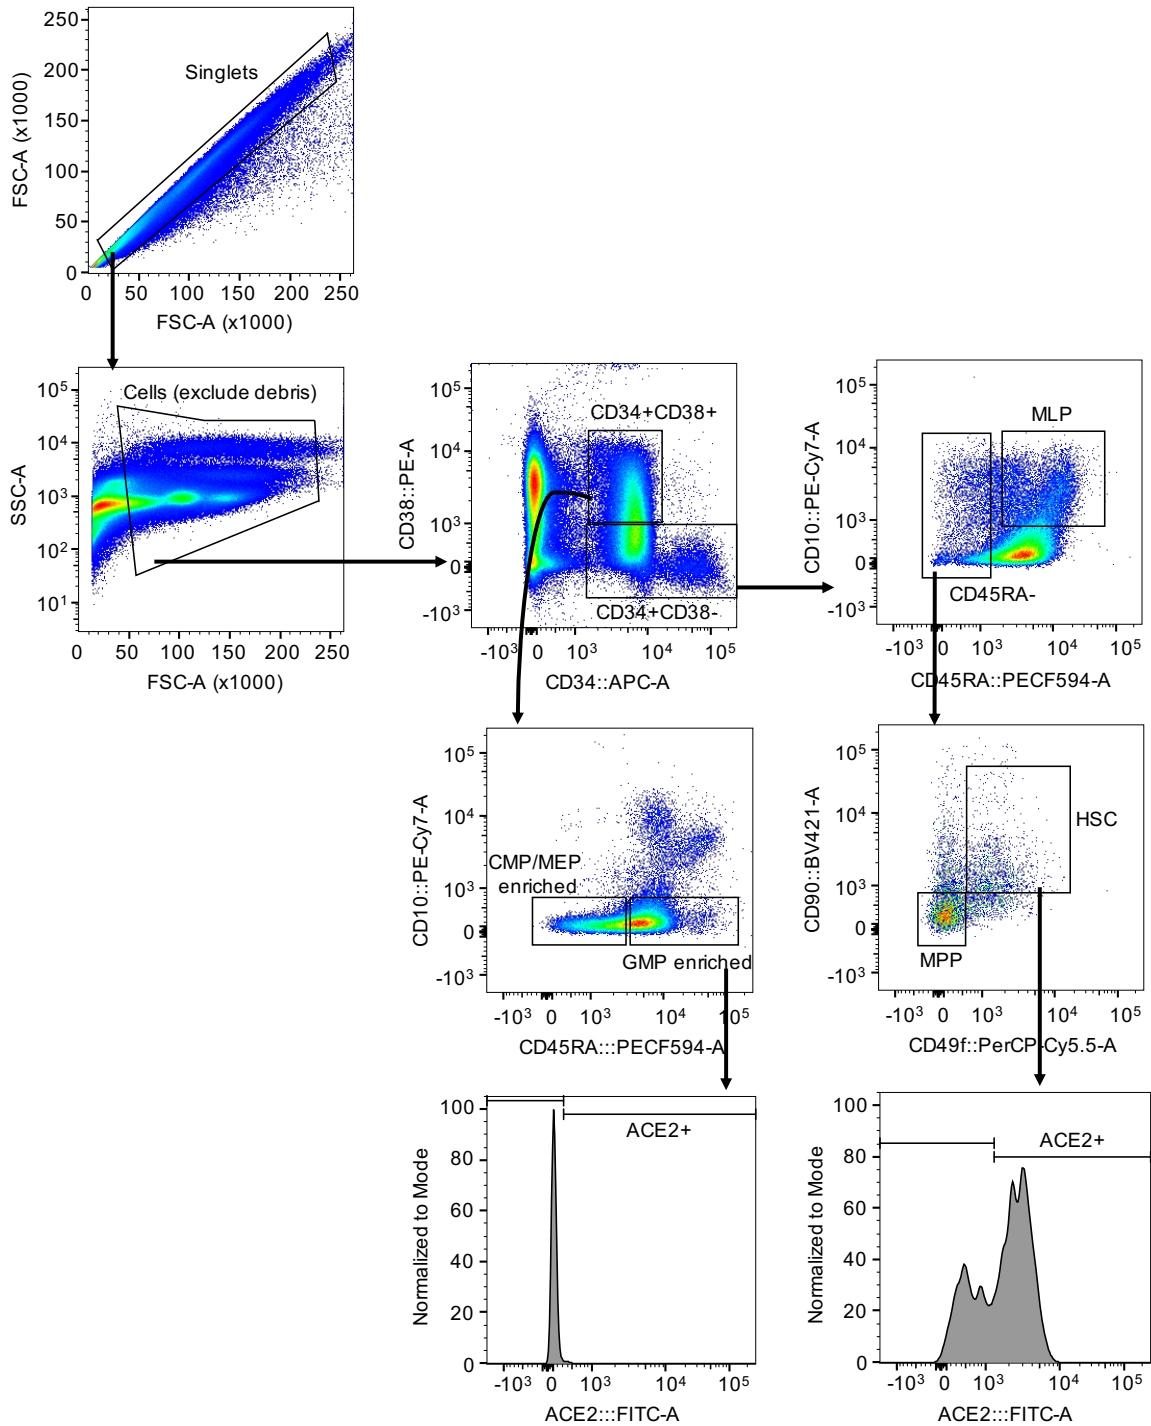

**Figure S1: Example gating strategy for cord blood cells.** Shown is an example for how HSC/HPC were analyzed by flow cytometry to assess ACE2 cell surface expression.

## Figure S2

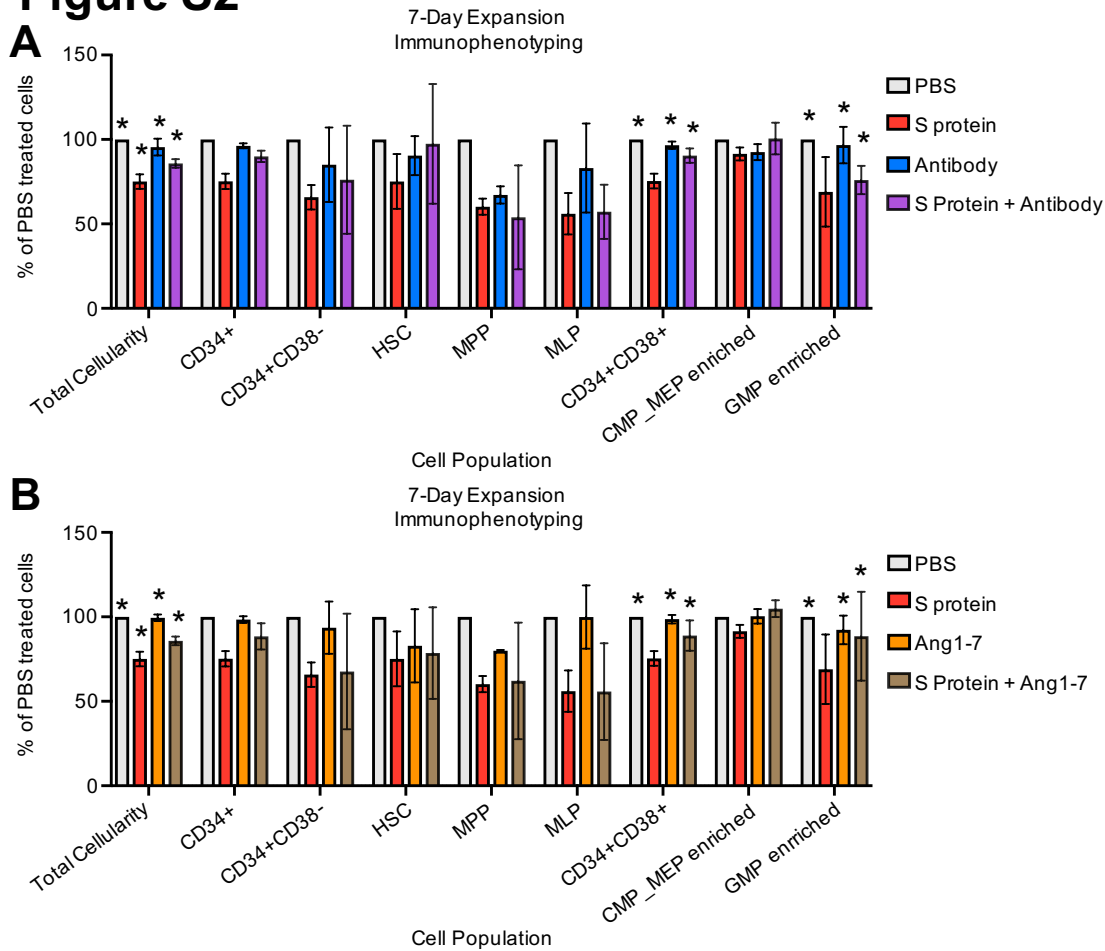

**Figure S2: Expansion of immunophenotypically defined HSC/HPC in the presence of S protein and neutralizing agents.** A-B) CD34<sup>+</sup> enriched cells were plated at 100,000 cells/mL in media with stimulating growth factors and with PBS control, 1  $\mu$ g/mL recombinant S protein alone, 1  $\mu$ g/mL S protein pre-incubated with 1  $\mu$ g/mL SARS-CoV-2 neutralizing antibody (Antibody) (A) or 1  $\mu$ g/mL S protein with 1  $\mu$ g/mL Angiotensin1-7 (Ang1-7) (B) and grown for 7 days in 5% O<sub>2</sub> and 5% CO<sub>2</sub> at 37°C. Cells were then analyzed by flow cytometry for the indicated cell populations, total cell numbers were calculated, and are shown as a percentage of PBS treated cells stats: generalized linear modelling followed by ANOVA with TukeyHSD post hoc tests. Significance codes indicate comparisons to Day 0 totals. \*P<0.05.

**Figure S3**

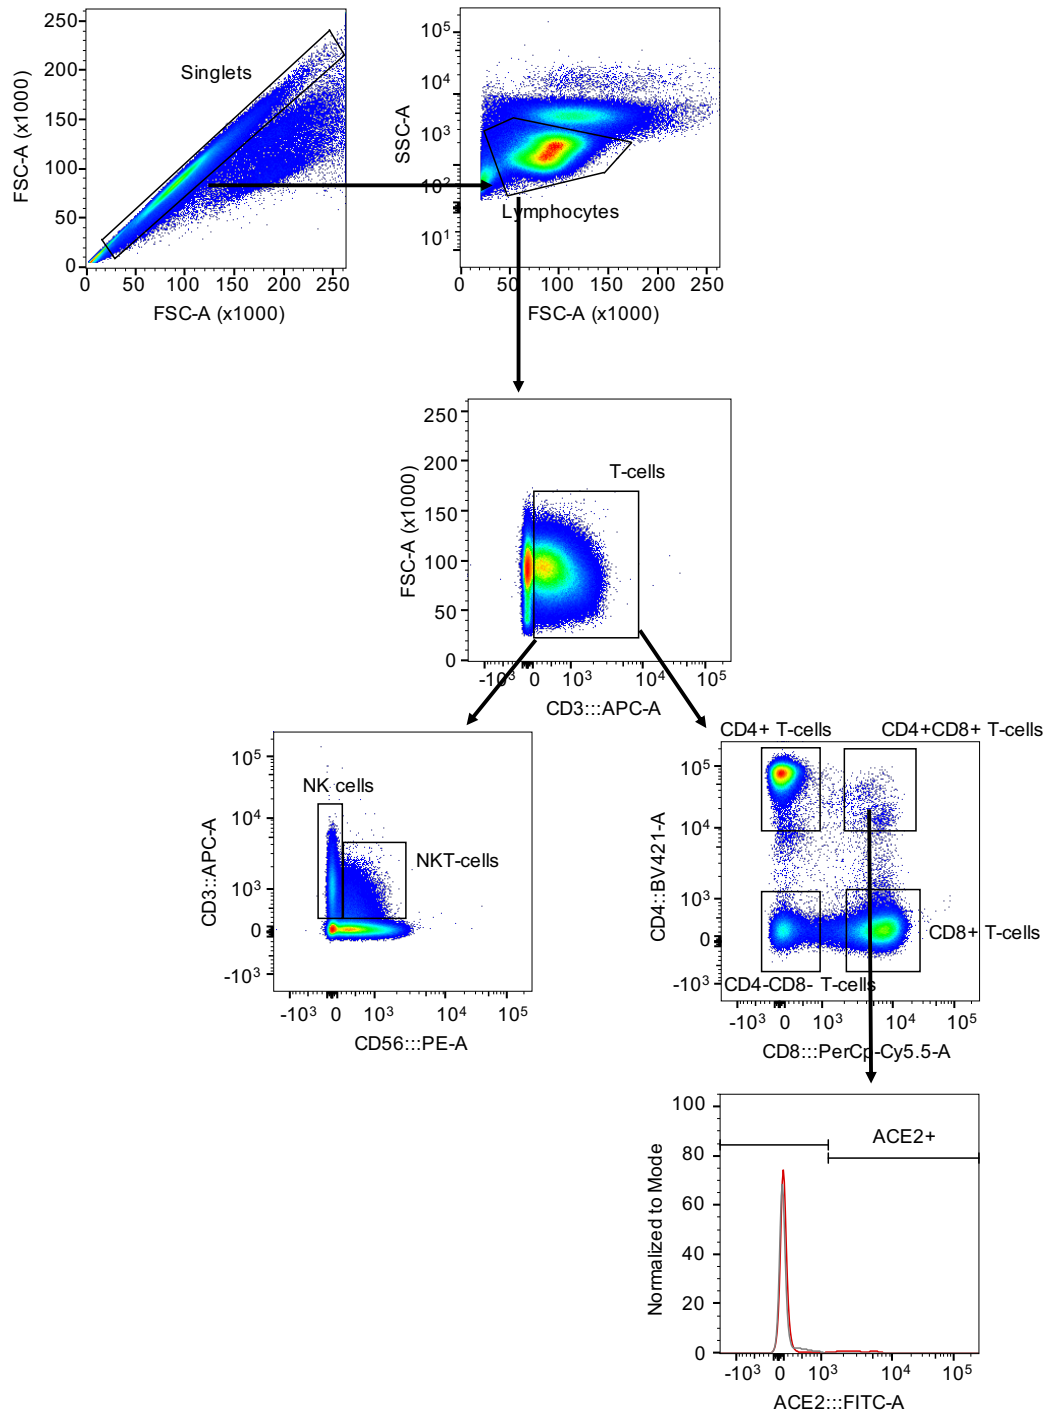

**Figure S3: Example gating strategy for peripheral blood cells.** Shown is an example for how T-cells were analyzed by flow cytometry to assess ACE2 cell surface expression.
